# Supplementary material for: Incorporating observed fire severity in refined emissions estimates for boreal and temperate forest fires in the carbon budget model CBM-CFS3 v1.2
Source: Copernicus journal article supplement (doi:10.5194/egusphere-2025-5739), 2026-01-04
Supplement: Supplementary file 1 [file egusphere-2025-5739-supplement.pdf]

Supplementary Material: Incorporating observed fire severity in  
refined emissions estimates for boreal and temperate forest fires in  
the carbon budget model CBM-CFS3 v1.2

2025-12-29

**S1 - Mean pool size by Reconciliation Unit**

Table S1: Carbon pool size (Mg C/ha) for canopy fuels by Reconciliation Unit for 2023. RU are sorted in decreasing size of Softwood Merchantable, the largest average surface pool. Columns are in decreasing mean pool size.

| Ecozone | Jurisdiction          | RU | Softwood Mer-<br>chantable | Softwood Other | Hardwood Mer-<br>chantable | Softwood Stem Snag | Hardwood Other | Softwood Foliage | Hardwood Stem Snag | Softwood Branch Snag | Hardwood Branch Snag | Hardwood Foliage |
|---------|-----------------------|----|----------------------------|----------------|----------------------------|--------------------|----------------|------------------|--------------------|----------------------|----------------------|------------------|
| PM      | British Columbia      | 41 | 75.7                       | 33.9           | 3.1                        | 10.1               | 1.2            | 9.3              | 0.4                | 2.3                  | 0.1                  | 0.1              |
| TP      | Yukon Territory       | 44 | 33.3                       | 13.0           | 27.5                       | 5.7                | 12.1           | 3.5              | 4.7                | 0.8                  | 0.7                  | 1.1              |
| PM      | Yukon Territory       | 47 | 30.3                       | 17.1           | 4.1                        | 5.8                | 2.9            | 4.7              | 1.3                | 1.4                  | 0.3                  | 0.2              |
| HP      | Ontario               | 18 | 29.8                       | 9.4            | 3.9                        | 4.8                | 1.6            | 4.0              | 1.0                | 0.7                  | 0.1                  | 0.3              |
| BC      | Yukon Territory       | 46 | 26.7                       | 15.7           | 3.9                        | 6.0                | 2.5            | 3.9              | 1.1                | 1.7                  | 0.3                  | 0.2              |
| MC      | Alberta               | 36 | 25.8                       | 19.2           | 3.1                        | 3.4                | 2.5            | 3.8              | 0.4                | 1.6                  | 0.2                  | 0.2              |
| BC      | British Columbia      | 40 | 24.5                       | 22.7           | 2.8                        | 4.9                | 2.1            | 4.6              | 0.4                | 2.5                  | 0.2                  | 0.2              |
| MC      | British Columbia      | 42 | 23.7                       | 13.7           | 2.8                        | 7.2                | 1.1            | 3.6              | 0.5                | 1.9                  | 0.1                  | 0.1              |
| BC      | Northwest Territories | 54 | 21.1                       | 17.0           | 1.3                        | 8.4                | 1.0            | 3.6              | 0.7                | 1.4                  | 0.1                  | 0.1              |
| TC      | Yukon Territory       | 45 | 20.7                       | 12.2           | 4.4                        | 6.9                | 4.1            | 3.4              | 2.2                | 1.4                  | 0.4                  | 0.3              |
| BSW     | Ontario               | 16 | 20.3                       | 7.7            | 1.2                        | 4.5                | 0.5            | 3.2              | 0.4                | 0.8                  | 0.1                  | 0.1              |
| BSE     | Newfoundland          | 1  | 20.1                       | 16.2           | 2.7                        | 2.3                | 2.9            | 9.3              | 0.4                | 1.1                  | 0.2                  | 0.8              |
| TC      | Northwest Territories | 53 | 18.6                       | 11.1           | 0.4                        | 3.8                | 0.2            | 2.5              | 0.1                | 0.9                  | 0.0                  | 0.0              |
| BSE     | Labrador              | 4  | 17.8                       | 14.8           | 0.5                        | 6.2                | 0.5            | 8.8              | 0.2                | 1.3                  | 0.0                  | 0.1              |
| BP      | Alberta               | 34 | 16.5                       | 15.1           | 5.2                        | 3.0                | 4.8            | 3.4              | 1.8                | 1.6                  | 0.6                  | 0.2              |
| TSE     | Labrador              | 3  | 16.3                       | 13.4           | 0.1                        | 9.1                | 0.2            | 7.1              | 0.1                | 1.2                  | 0.0                  | 0.0              |
| BSE     | Quebec                | 15 | 15.8                       | 6.9            | 8.8                        | 2.9                | 4.4            | 1.9              | 1.1                | 0.6                  | 0.3                  | 0.6              |
| AM      | Quebec                | 11 | 15.7                       | 7.4            | 11.0                       | 2.1                | 5.7            | 1.3              | 1.2                | 0.6                  | 0.4                  | 0.6              |
| AM      | Prince Edward Island  | 6  | 14.4                       | 6.4            | 12.6                       | 1.4                | 7.3            | 2.7              | 1.3                | 0.4                  | 0.4                  | 1.3              |
| BSW     | Manitoba              | 22 | 14.0                       | 4.9            | 4.2                        | 4.4                | 1.4            | 1.8              | 1.2                | 0.6                  | 0.2                  | 0.3              |
| BSE     | Ontario               | 19 | 13.5                       | 4.9            | 11.7                       | 1.8                | 4.9            | 2.0              | 1.7                | 0.3                  | 0.3                  | 0.9              |
| TP      | Alberta               | 31 | 12.3                       | 11.4           | 2.5                        | 4.0                | 2.5            | 1.9              | 2.9                | 1.3                  | 0.4                  | 0.1              |
| AM      | New Brunswick         | 7  | 12.1                       | 7.6            | 9.6                        | 1.3                | 7.6            | 2.2              | 1.0                | 0.5                  | 0.5                  | 0.8              |
| TP      | British Columbia      | 38 | 11.8                       | 14.9           | 12.4                       | 1.9                | 6.8            | 2.0              | 2.1                | 1.0                  | 0.5                  | 0.5              |
| BP      | Northwest Territories | 52 | 10.8                       | 20.2           | 2.1                        | 2.5                | 7.2            | 1.8              | 0.5                | 2.2                  | 0.8                  | 0.4              |
| BP      | Saskatchewan          | 28 | 9.2                        | 3.3            | 10.8                       | 2.9                | 2.7            | 1.3              | 2.6                | 0.3                  | 0.3                  | 0.4              |
| TP      | Northwest Territories | 50 | 9.0                        | 6.3            | 2.9                        | 2.6                | 3.4            | 1.1              | 0.9                | 0.5                  | 0.3                  | 0.2              |
| BSW     | Saskatchewan          | 27 | 8.9                        | 2.9            | 1.8                        | 5.1                | 0.6            | 1.1              | 1.1                | 0.5                  | 0.1                  | 0.1              |
| AM      | Nova Scotia           | 5  | 8.8                        | 2.9            | 17.6                       | 1.1                | 7.4            | 1.0              | 1.9                | 0.2                  | 0.4                  | 1.2              |
| BP      | Manitoba              | 23 | 8.1                        | 3.4            | 12.0                       | 2.2                | 4.2            | 1.4              | 3.3                | 0.4                  | 0.4                  | 1.5              |
| BP      | British Columbia      | 39 | 7.3                        | 8.7            | 19.7                       | 2.1                | 9.2            | 1.8              | 2.9                | 1.0                  | 0.8                  | 0.7              |
| TSW     | Alberta               | 32 | 6.5                        | 11.5           | 2.2                        | 3.0                | 5.0            | 2.6              | 1.5                | 1.3                  | 0.5                  | 0.2              |
| TSW     | Northwest Territories | 51 | 4.6                        | 10.5           | 0.7                        | 2.1                | 1.3            | 1.7              | 0.4                | 1.7                  | 0.1                  | 0.1              |
| BSW     | Alberta               | 33 | 1.1                        | 6.2            | 1.2                        | 1.0                | 7.0            | 1.5              | 1.4                | 1.2                  | 1.6                  | 0.3              |

Table S2: Carbon pool (Mg C/ha) for sub-canopy fuels by Reconciliation Unit for 2023. RU are sorted in decreasing size of Aboveground Slow DOM, the largest average surface pool. Columns are in decreasing mean pool size.

| Ecozone | Jurisdiction          | RU | Aboveground<br>Slow DOM | Medium<br>DOM | Aboveground<br>Fast DOM | Aboveground<br>Very Fast<br>DOM | Softwood<br>Coarse Roots | Hardwood<br>Coarse Roots | Belowground<br>Fast DOM | Belowground<br>Very Fast<br>DOM | Softwood<br>Fine Roots | Hardwood<br>Fine Roots |
|---------|-----------------------|----|-------------------------|---------------|-------------------------|---------------------------------|--------------------------|--------------------------|-------------------------|---------------------------------|------------------------|------------------------|
| PM      | British Columbia      | 41 | 58.3                    | 19.1          | 16.1                    | 8.7                             | 24.1                     | 0.8                      | 3.0                     | 1.4                             | 2.3                    | 0.1                    |
| PM      | Yukon Territory       | 47 | 46.1                    | 32.2          | 22.8                    | 25.5                            | 10.1                     | 3.5                      | 3.6                     | 4.1                             | 1.4                    | 0.5                    |
| TP      | Yukon Territory       | 44 | 46.0                    | 22.3          | 14.7                    | 15.4                            | 9.9                      | 9.5                      | 3.2                     | 2.5                             | 1.1                    | 1.0                    |
| BSE     | Newfoundland          | 1  | 44.2                    | 5.9           | 9.3                     | 10.2                            | 8.7                      | 2.7                      | 1.5                     | 1.3                             | 1.4                    | 0.4                    |
| TC      | Yukon Territory       | 45 | 42.0                    | 29.2          | 19.9                    | 14.7                            | 7.0                      | 3.5                      | 3.5                     | 2.9                             | 1.0                    | 0.6                    |
| BSE     | Labrador              | 4  | 41.5                    | 13.0          | 11.2                    | 11.4                            | 7.7                      | 0.2                      | 1.6                     | 1.7                             | 1.5                    | 0.0                    |
| BP      | Manitoba              | 23 | 39.5                    | 12.7          | 5.4                     | 12.0                            | 2.3                      | 5.1                      | 1.4                     | 1.5                             | 0.5                    | 1.0                    |
| AM      | New Brunswick         | 7  | 38.8                    | 7.0           | 9.8                     | 6.9                             | 4.1                      | 5.4                      | 1.8                     | 1.1                             | 0.7                    | 0.9                    |
| BP      | Northwest Territories | 52 | 38.5                    | 7.4           | 20.8                    | 9.9                             | 6.2                      | 3.8                      | 2.2                     | 2.3                             | 1.1                    | 0.7                    |
| BP      | Alberta               | 34 | 37.8                    | 10.4          | 14.8                    | 6.6                             | 6.7                      | 3.2                      | 2.4                     | 1.6                             | 1.0                    | 0.6                    |
| BC      | British Columbia      | 40 | 37.6                    | 9.6           | 18.0                    | 9.8                             | 10.0                     | 1.0                      | 2.2                     | 2.1                             | 1.5                    | 0.2                    |
| MC      | Alberta               | 36 | 35.6                    | 12.2          | 15.7                    | 7.7                             | 9.4                      | 2.6                      | 2.4                     | 1.8                             | 1.4                    | 0.4                    |
| AM      | Prince Edward Island  | 6  | 35.4                    | 6.1           | 5.8                     | 7.4                             | 4.4                      | 5.0                      | 1.1                     | 1.0                             | 0.8                    | 0.9                    |
| BC      | Yukon Territory       | 46 | 34.8                    | 21.2          | 16.1                    | 11.8                            | 9.0                      | 2.9                      | 2.8                     | 2.6                             | 1.3                    | 0.4                    |
| AM      | Quebec                | 11 | 33.8                    | 9.0           | 8.7                     | 7.1                             | 4.6                      | 5.0                      | 1.8                     | 1.3                             | 0.8                    | 0.9                    |
| BSE     | Quebec                | 15 | 32.0                    | 10.7          | 8.1                     | 8.4                             | 4.6                      | 4.1                      | 1.7                     | 1.5                             | 0.9                    | 0.7                    |
| AM      | Nova Scotia           | 5  | 31.4                    | 6.0           | 4.9                     | 6.1                             | 2.2                      | 6.3                      | 1.1                     | 0.9                             | 0.6                    | 1.2                    |
| TSE     | Labrador              | 3  | 30.7                    | 15.2          | 10.3                    | 8.0                             | 6.7                      | 0.1                      | 1.9                     | 1.8                             | 1.5                    | 0.0                    |
| BP      | British Columbia      | 39 | 29.3                    | 10.1          | 10.9                    | 7.8                             | 3.3                      | 5.9                      | 1.6                     | 1.4                             | 0.7                    | 0.8                    |
| MC      | British Columbia      | 42 | 27.8                    | 12.9          | 11.5                    | 5.3                             | 7.9                      | 0.8                      | 2.3                     | 1.2                             | 1.2                    | 0.1                    |
| BSE     | Ontario               | 19 | 27.3                    | 8.1           | 5.7                     | 7.9                             | 3.8                      | 5.0                      | 1.2                     | 1.3                             | 0.7                    | 0.9                    |
| HP      | Ontario               | 18 | 26.3                    | 14.6          | 6.5                     | 7.8                             | 8.2                      | 2.5                      | 1.4                     | 1.8                             | 1.4                    | 0.5                    |
| TP      | British Columbia      | 38 | 25.7                    | 7.6           | 10.1                    | 7.8                             | 5.4                      | 3.9                      | 1.4                     | 1.6                             | 1.0                    | 0.5                    |
| TP      | Alberta               | 31 | 24.2                    | 21.9          | 11.2                    | 5.4                             | 4.8                      | 1.9                      | 2.6                     | 1.7                             | 0.9                    | 0.5                    |
| BC      | Northwest Territories | 54 | 23.7                    | 31.7          | 15.8                    | 10.3                            | 7.8                      | 1.6                      | 2.4                     | 2.7                             | 1.5                    | 0.3                    |
| TSW     | Alberta               | 32 | 22.2                    | 19.2          | 12.7                    | 6.3                             | 3.8                      | 3.0                      | 2.4                     | 1.8                             | 0.8                    | 0.7                    |
| BP      | Saskatchewan          | 28 | 21.4                    | 13.3          | 5.0                     | 6.0                             | 2.5                      | 4.1                      | 1.5                     | 1.4                             | 0.6                    | 0.8                    |
| BSW     | Ontario               | 16 | 20.0                    | 10.7          | 6.0                     | 5.2                             | 5.7                      | 0.5                      | 1.3                     | 1.3                             | 1.3                    | 0.1                    |
| BSW     | Manitoba              | 22 | 17.2                    | 14.8          | 4.7                     | 6.1                             | 3.7                      | 2.3                      | 1.3                     | 1.6                             | 0.9                    | 0.5                    |
| TP      | Northwest Territories | 50 | 13.9                    | 13.1          | 6.9                     | 8.1                             | 2.9                      | 2.7                      | 1.5                     | 2.4                             | 0.8                    | 0.7                    |
| TC      | Northwest Territories | 53 | 11.3                    | 24.1          | 9.4                     | 10.0                            | 5.7                      | 0.5                      | 1.4                     | 3.0                             | 1.5                    | 0.1                    |
| BSW     | Alberta               | 33 | 11.0                    | 11.5          | 11.6                    | 5.0                             | 1.6                      | 3.3                      | 2.2                     | 1.4                             | 0.4                    | 1.0                    |
| BSW     | Saskatchewan          | 27 | 10.9                    | 13.0          | 3.7                     | 4.2                             | 2.2                      | 1.2                      | 1.4                     | 1.2                             | 0.6                    | 0.3                    |
| TSW     | Northwest Territories | 51 | 10.4                    | 11.9          | 10.1                    | 5.8                             | 3.0                      | 1.2                      | 1.9                     | 2.1                             | 0.7                    | 0.3                    |

## S2 - Annual variability in observed Buildup Index during wildfire spread, and impact on modelled ecozone-level forest floor emissions

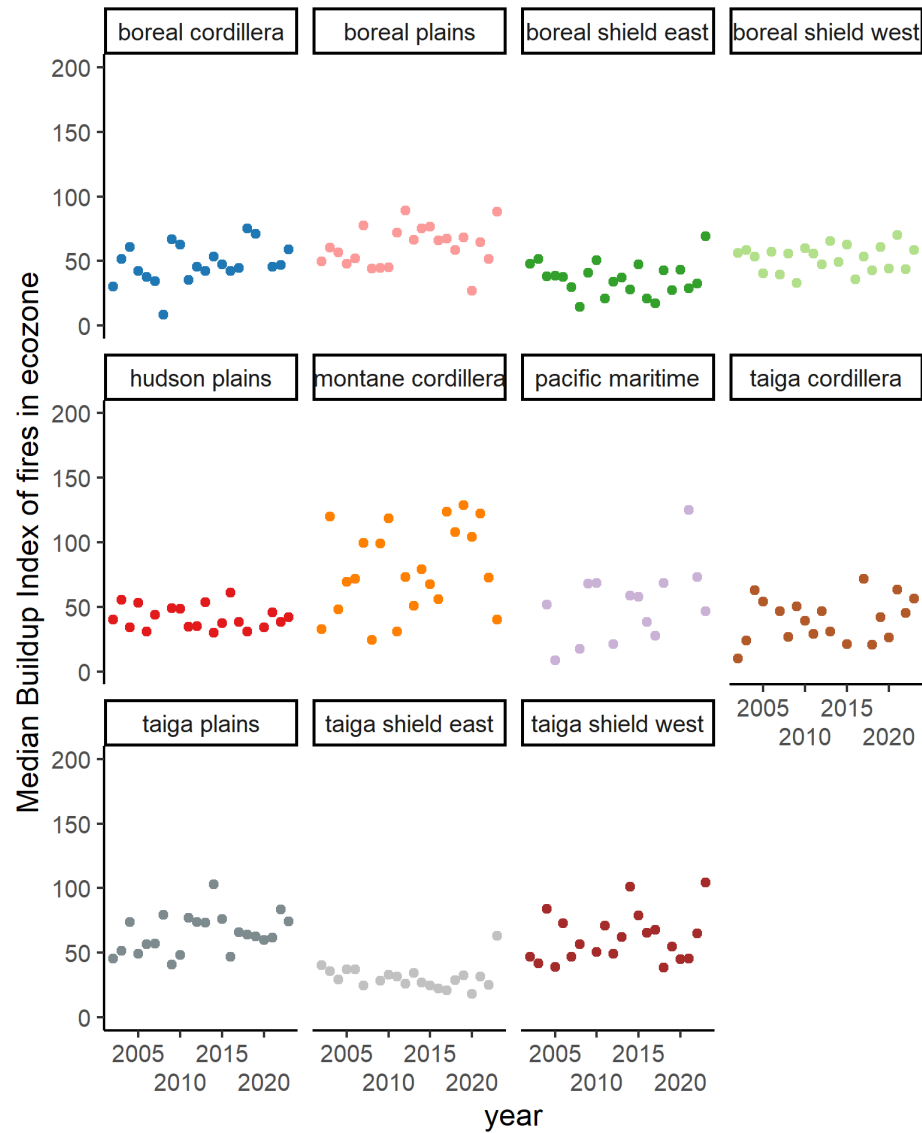

Figure S1: Annual variability in area-weighted median BUI of active fire spread days by ecozone.



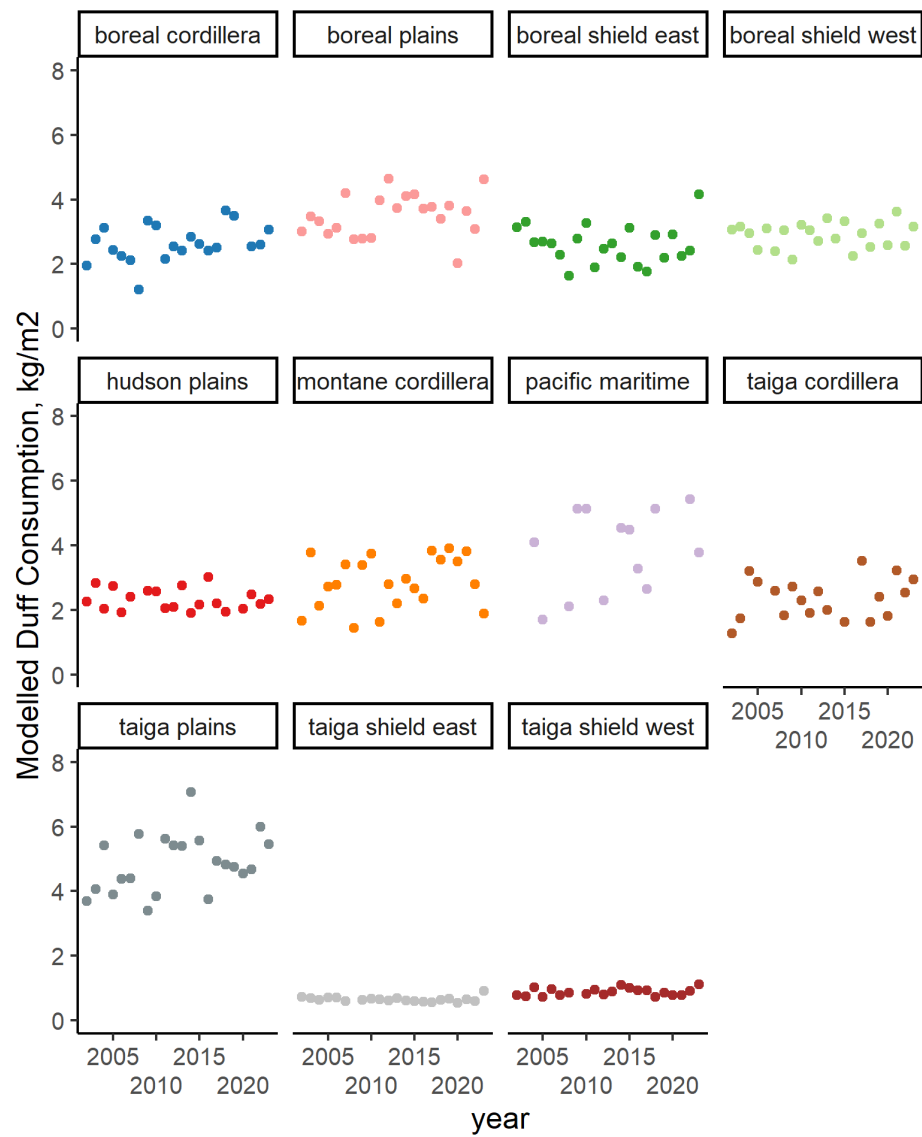

Figure S2: Annual variability in forest floor median consumption values by ecozone.

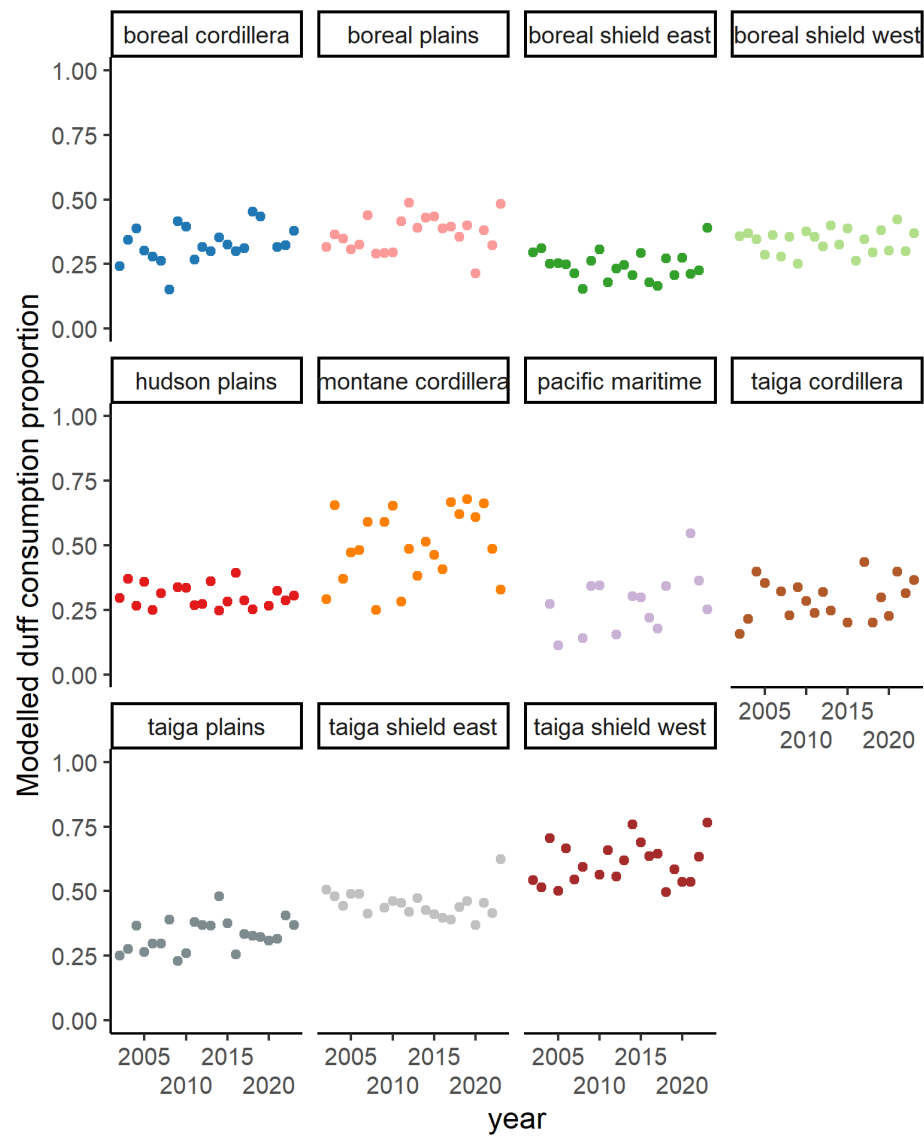

Figure S3: Annual variability in forest floor proportional consumption by ecozone.

### S3 - Representative photos

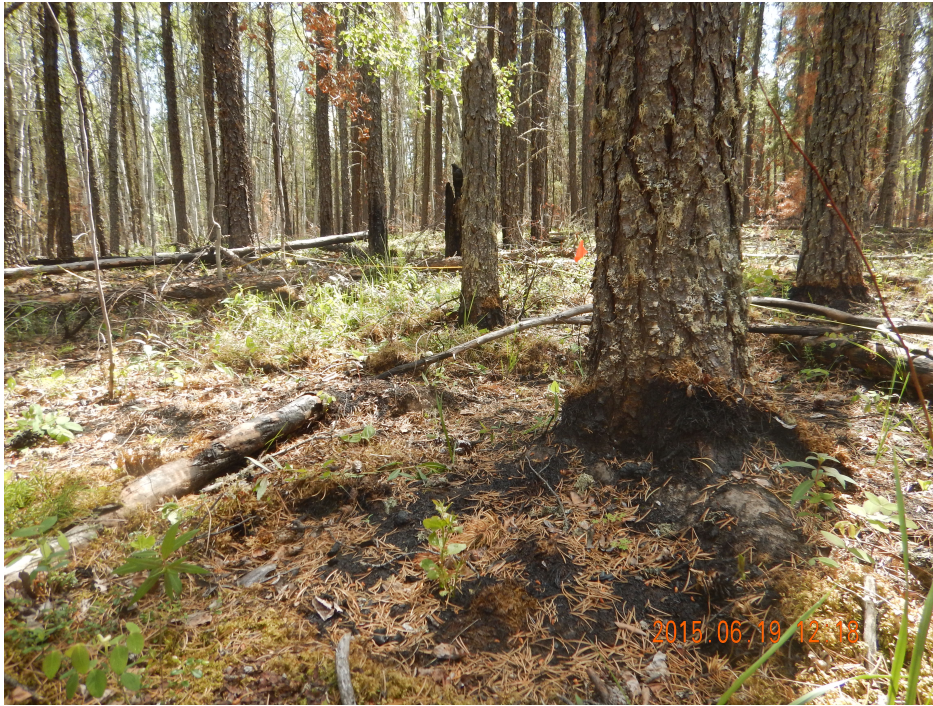

Figure S4: Partial area-wise burning of thin litter and duff layer in a boreal pine-aspen mixedwood stand following surface fire, one year after fire. Note low consumption of woody debris and snags.

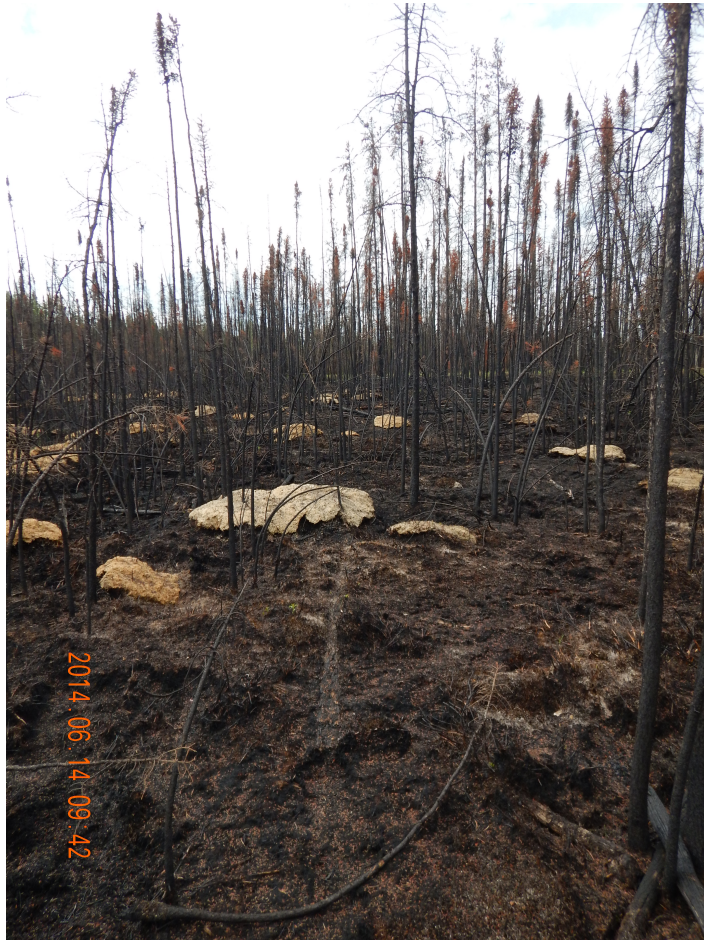

Figure S5: Continuous crown fire in a forested boreal peatland dominated by black spruce. 90% of the forest floor experienced approximately 10 cm of burning except small patches of Sphagnum moss that appear as unburned light coloured features. Note low consumption of downed woody debris embedded in unburned peat in bottom right corner



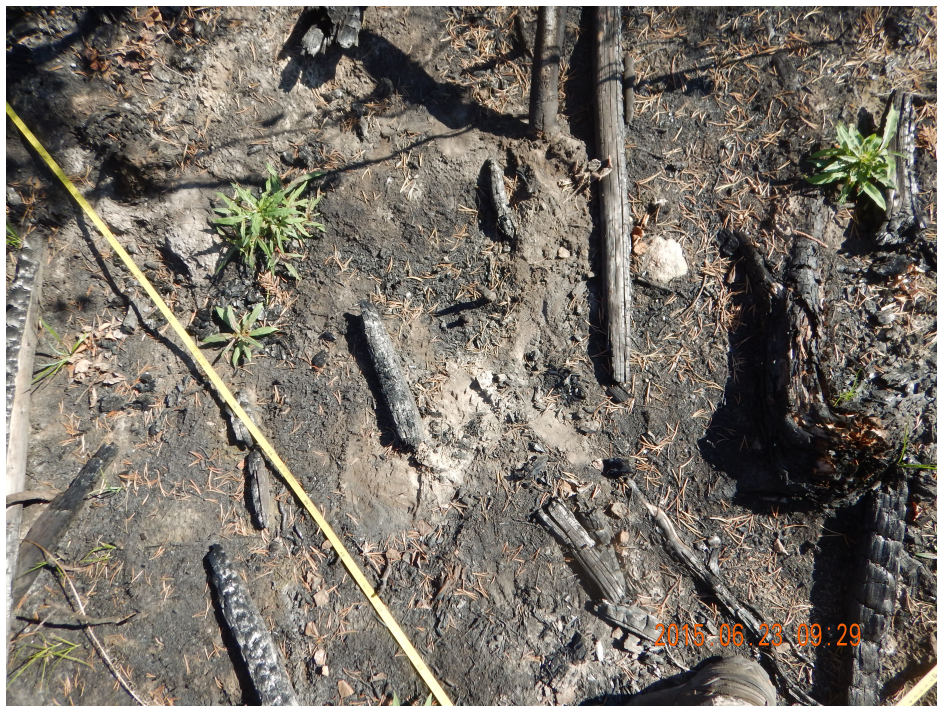

Figure S6: Example of high rates of relative duff consumption in a low pre-fire duff (AGSlow) loading. Note the low rates of woody debris and stump consumption in this jack pine-dominated stand.

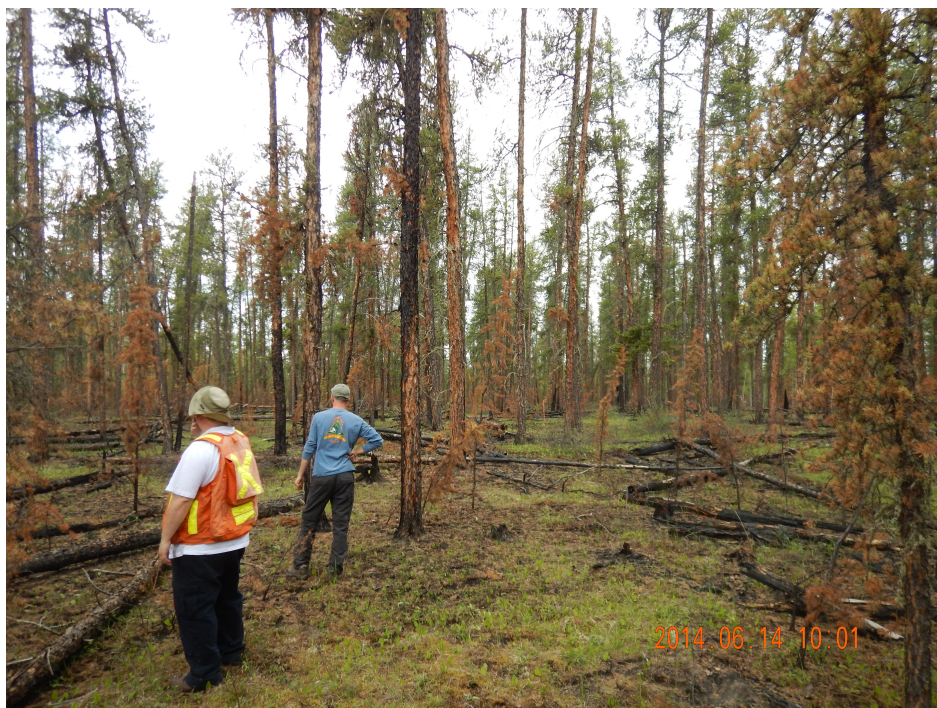

Figure S7: Preferential mortality of understory trees in a low-severity surface fire, one year after the fire. Larger diameter trees in the background remain alive with near-zero Crown Fraction Burned, while smaller diameter trees, many of which are  $<5$  m in height visible in the foreground, were killed by the fire but with no canopy fuel consumption even of smaller trees.



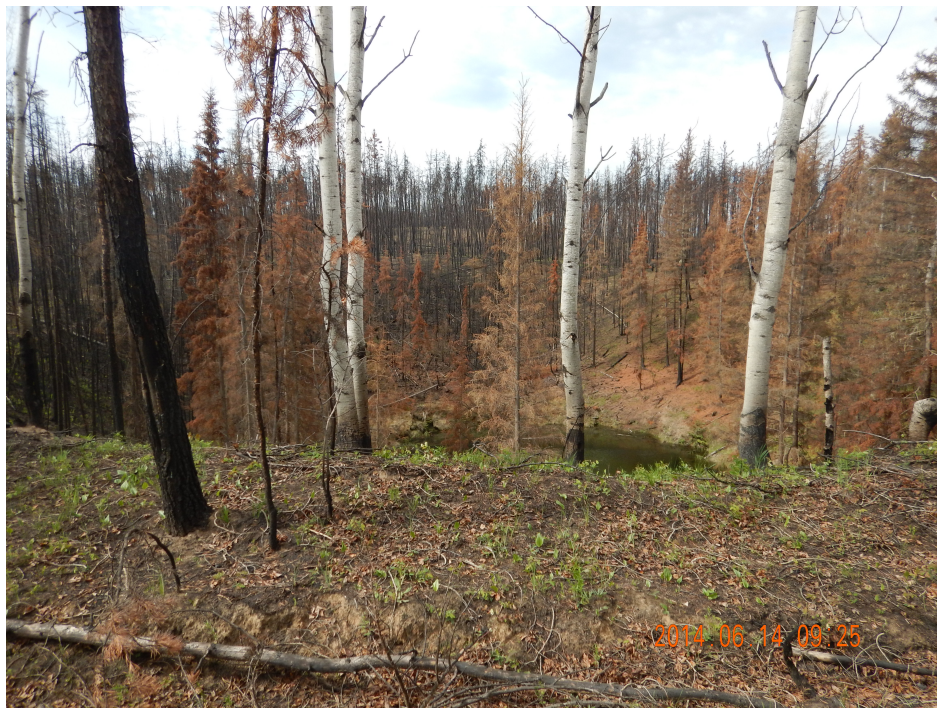

Figure S8: Patchy crown fuel consumption in a high severity fire, one year after the fire. While the majority of canopy fuels were consumed in this photo, local landscape features such as this depression allowed for small patches of trees to be killed by a surface fire, but the canopy remained unconsumed. These red needles remain on the tree for 1-2 years and afterwards are an input into the litter layer.

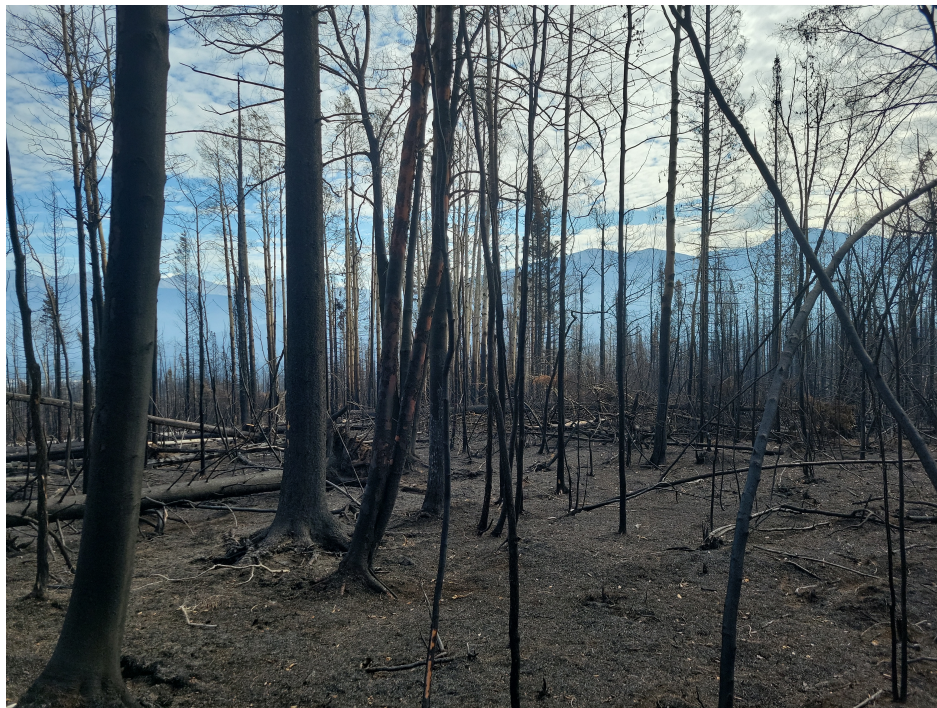

Figure S9: Example of consumption of broadleaf foliage during high severity fire in mixedwood fuels, taken one week after the fire. Note the lack of foliage in the aspen trees (white coloured stems in background) in a mixedwood with Engelmann spruce and subalpine fir.
